# Supplementary material for: A two-terminal binary HfO2 resistance switching random access memory for an artificial synaptic device
Source: Royal Society of Chemistry journal article supplement (doi:10.1039/d2tc03454a), 2022-12-02
Supplement: d2tc03454a1.pdf [file d2tc03454a1.pdf]

## Supporting Information

### **A two-terminal binary HfO<sub>2</sub> resistance switching random access memory for artificial synaptic device**

Xiaozhang Chen,<sup>a,c</sup> You Lv,<sup>a,c</sup> Zhaobo Tian,<sup>a,c</sup> Jingxi Yang,<sup>a</sup> Yuan Zhu,<sup>\*a,b</sup>

Longxing Su<sup>\*a</sup>

---

<sup>a</sup> School of Microelectronics, Southern University of Science and Technology, Shenzhen, 518055, China

<sup>b</sup> Engineering Research Center of Integrated Circuits for Next-Generation Communications, Ministry of Education, Southern University of Science and Technology, Shenzhen 518055, China

<sup>c</sup> These authors contribute equally to this work.

\* Authors to whom correspondence should be addressed: [zhuy3@sustech.edu.cn](mailto:zhuy3@sustech.edu.cn) and [sulx@sustech.edu.cn](mailto:sulx@sustech.edu.cn)

These file includes:

- 1. Figure S1 The fabrication processes of the HfO<sub>2</sub> RRAM device.**
2. Figure S2 The Raman spectrum of the as-prepared HfO<sub>2</sub> sample.
3. Figure S3 The solutions mixed with HfO<sub>2</sub> powders purchased from Aladdin (Left) and prepared by hydrothermal method (Right).
4. Figure S4 The SEM image of the as prepared HfO<sub>2</sub> sample.
5. Figure S5 The SEM image of the HfO<sub>2</sub> purchased from Aladdin corporation.
6. Figure S6 The TEM image of the as prepared HfO<sub>2</sub> sample. M, O, and T represent monoclinic, orthorhombic, and tetragonal phases.
- 7. Figure S7 The TEM image of the as prepared HfO<sub>2</sub> sample, in which the lattice vacancies in different regions are clearly identified.**
- 8. Figure S8 The SEM images and EDS spectra of the HfO<sub>2</sub> MIM device after the measurement.**
- 9. Figure S9 The XPS spectra of the HfO<sub>2</sub> MIM device after the measurement.**

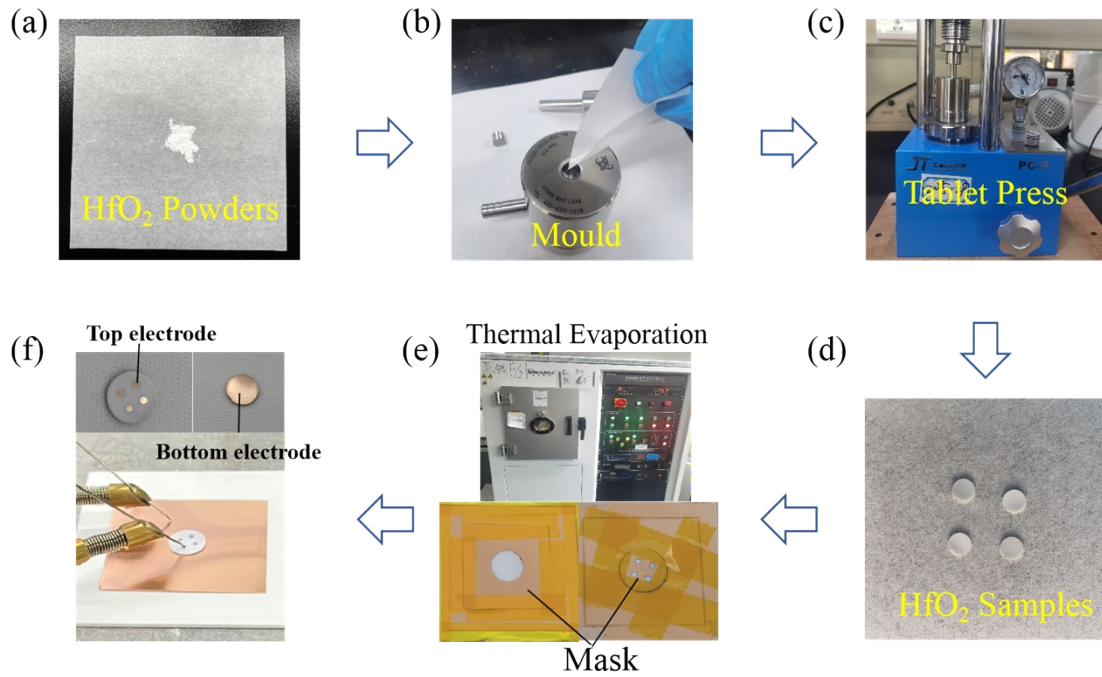

**Figure S1 The fabrication processes of the HfO<sub>2</sub> RRAM device.**

**(a→b)** The as-prepared HfO<sub>2</sub> powders were loaded into a stainless steel mould;  
**(b→c→d)** The as-prepared HfO<sub>2</sub> powders were re-shaped into a wafer-like HfO<sub>2</sub> sample under 8 MPa by using a powder tablet press; **(d→e→f)** The bottom and top Cu electrodes were deposited onto the re-shaped wafer-like HfO<sub>2</sub> sample by using a thermal evaporation method.

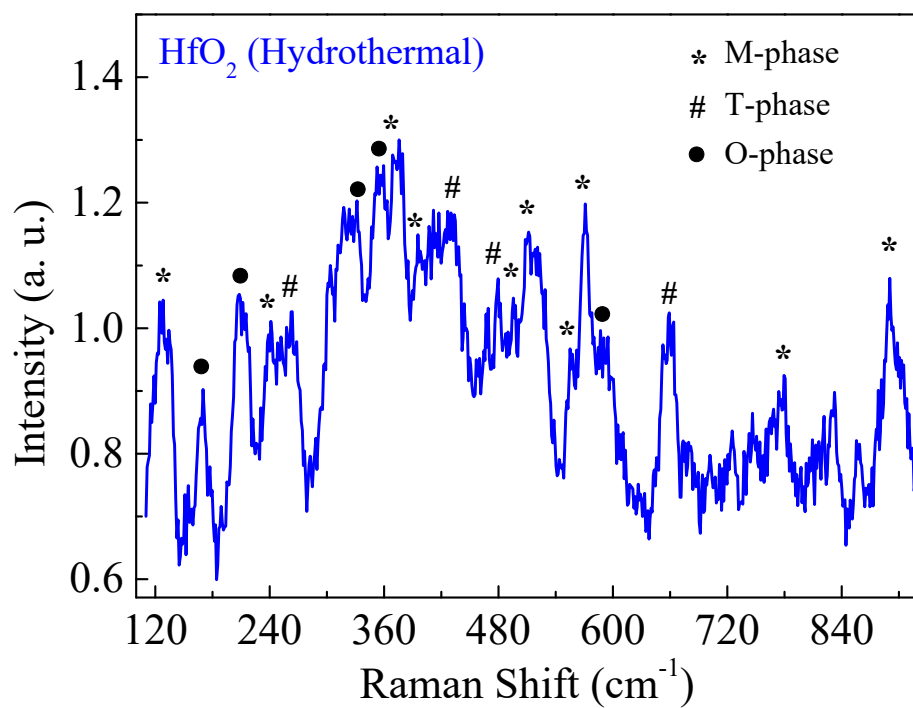

Figure S2 The Raman spectrum of the as-prepared HfO<sub>2</sub> sample.

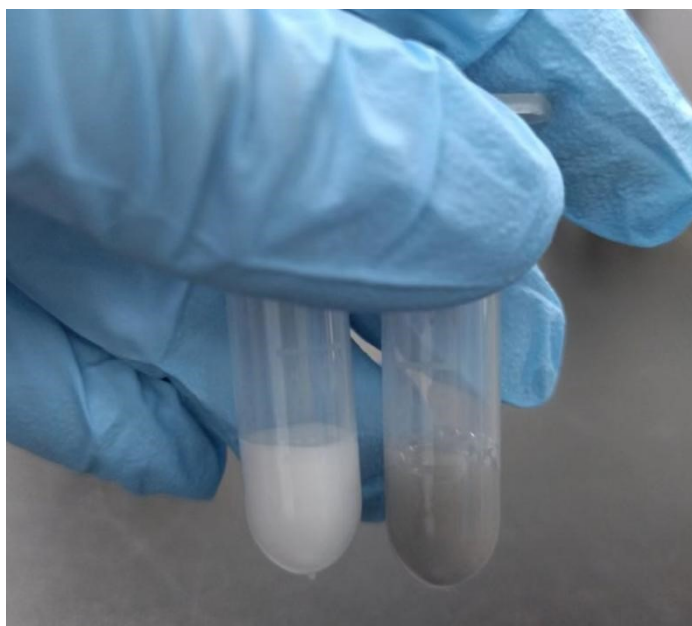

Figure S3 The solutions mixed with  $\text{HfO}_2$  powders purchased from Aladdin (Left) and prepared by hydrothermal method (Right).

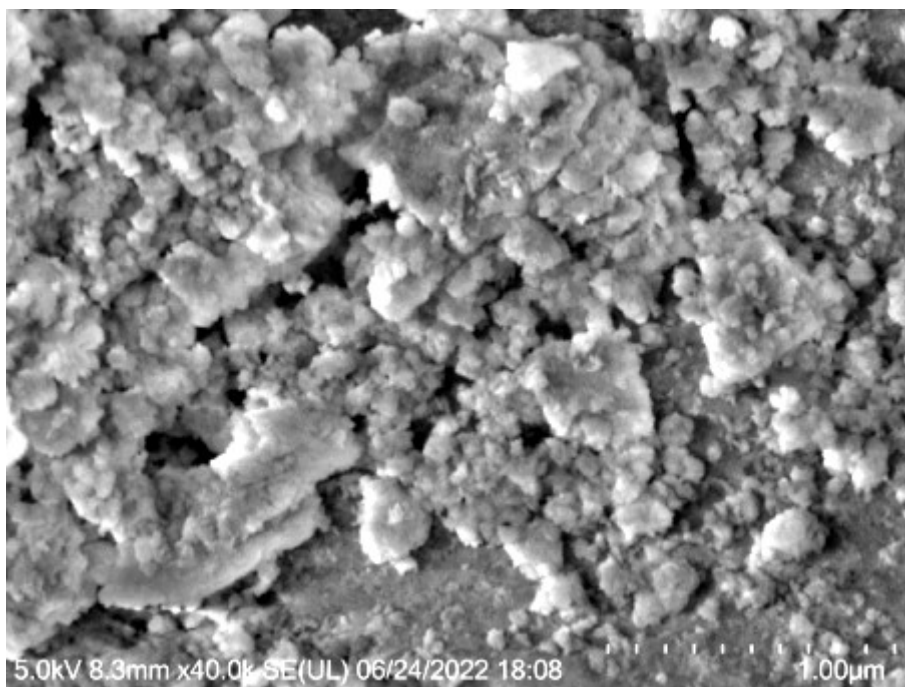

Figure S4 The SEM image of the as prepared HfO<sub>2</sub> sample.

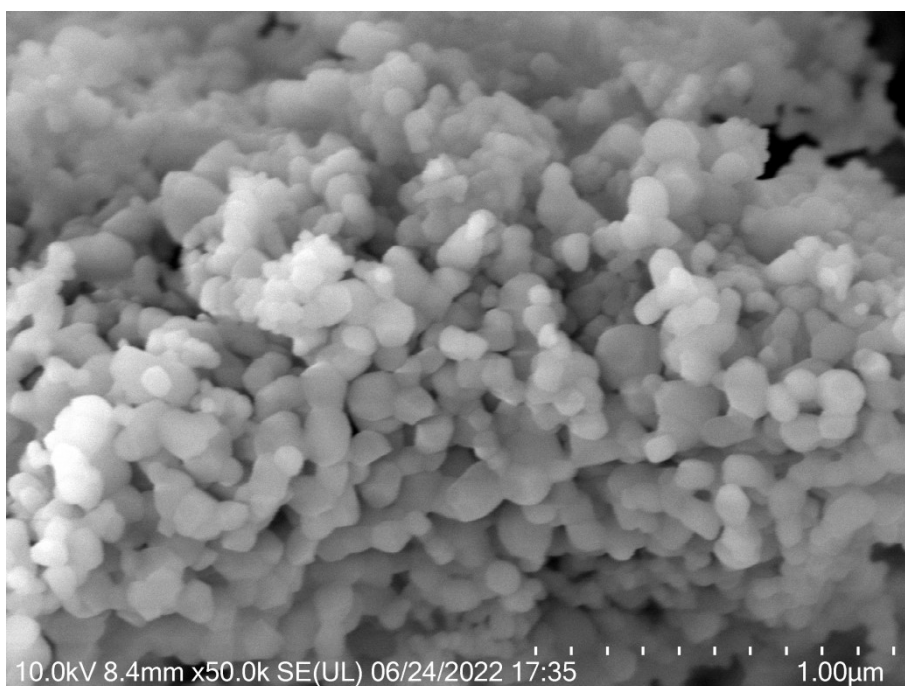

Figure S5 The SEM image of the HfO<sub>2</sub> purchased from Aladdin corporation.

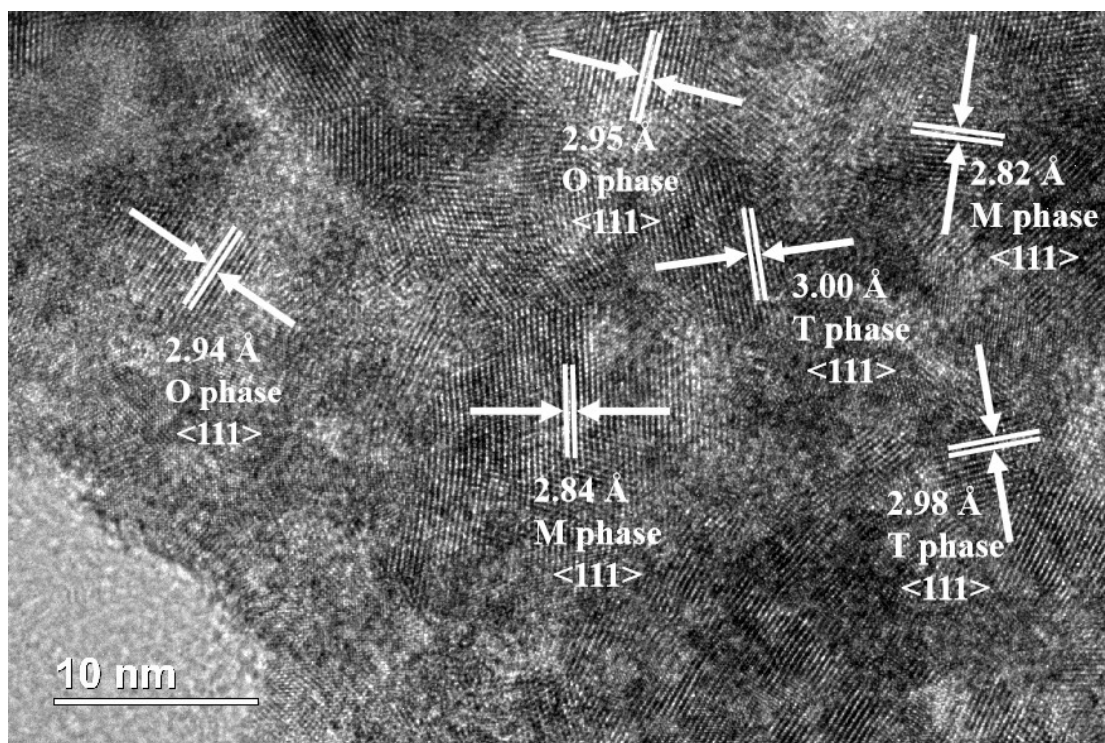

Figure S6 The TEM image of the as prepared HfO<sub>2</sub> sample. M, O, and T represent monoclinic, orthorhombic, and tetragonal phases.



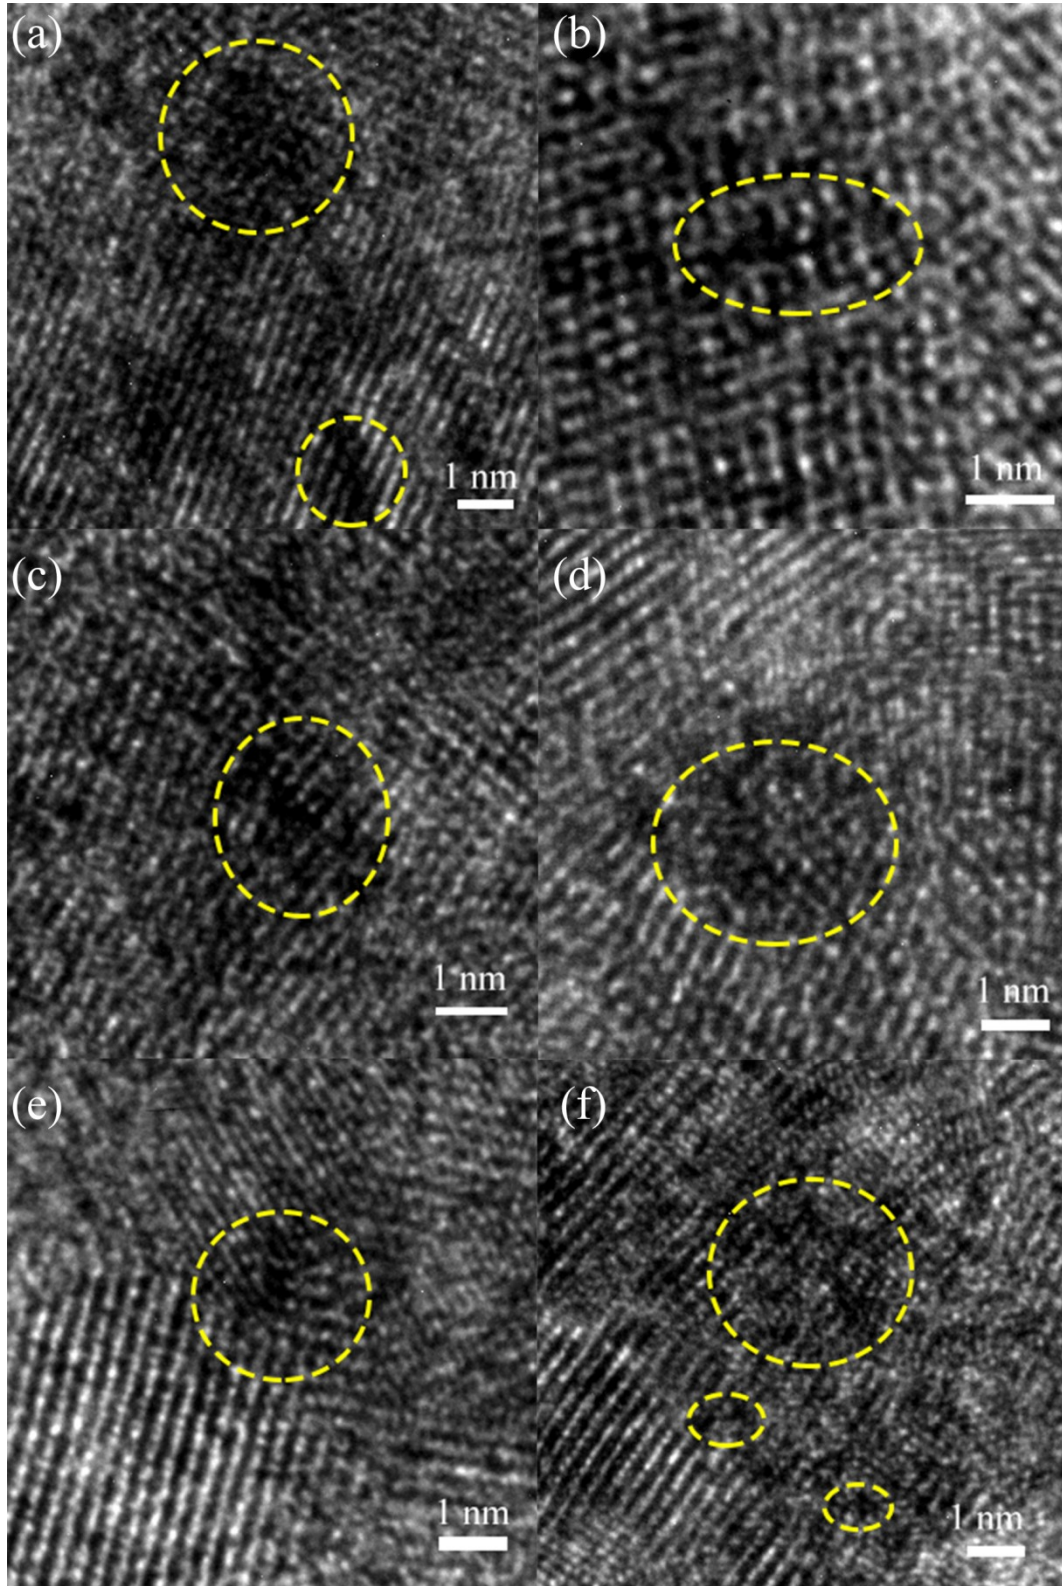

**Figure S7** The TEM image of the as prepared HfO<sub>2</sub> sample, in which the lattice vacancies in different regions are clearly identified.

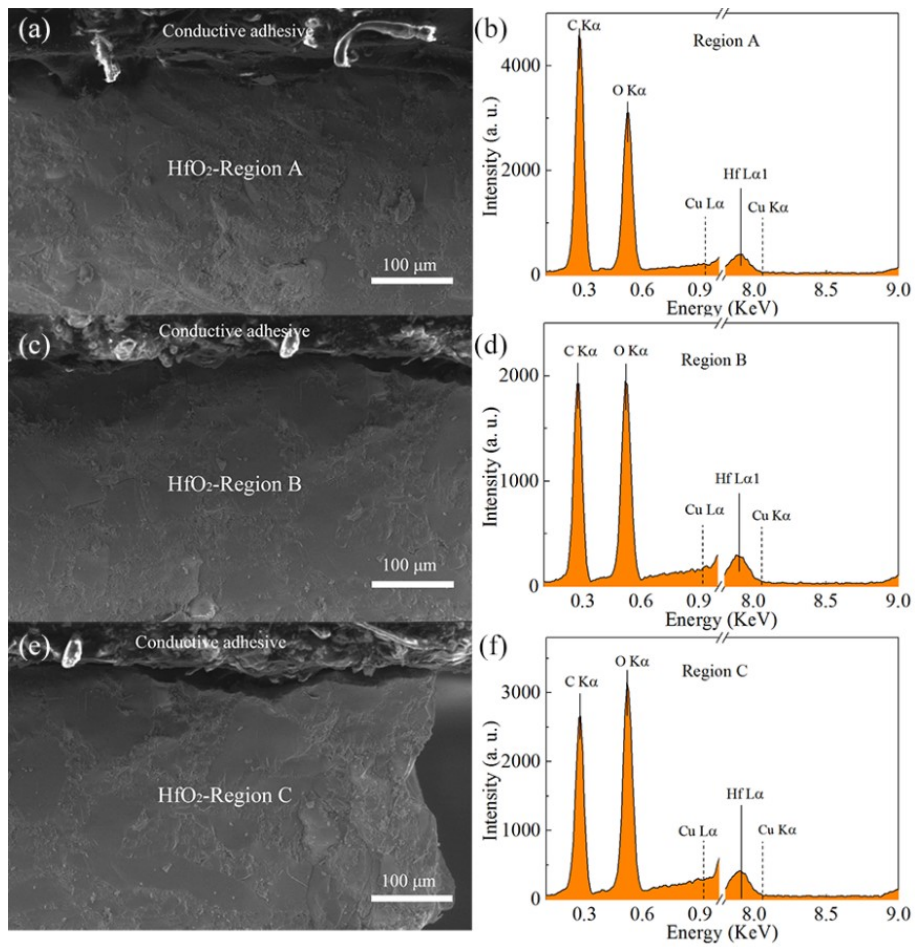

**Figure S8 The SEM images and EDS spectra of the HfO<sub>2</sub> MIM device after the measurement.**



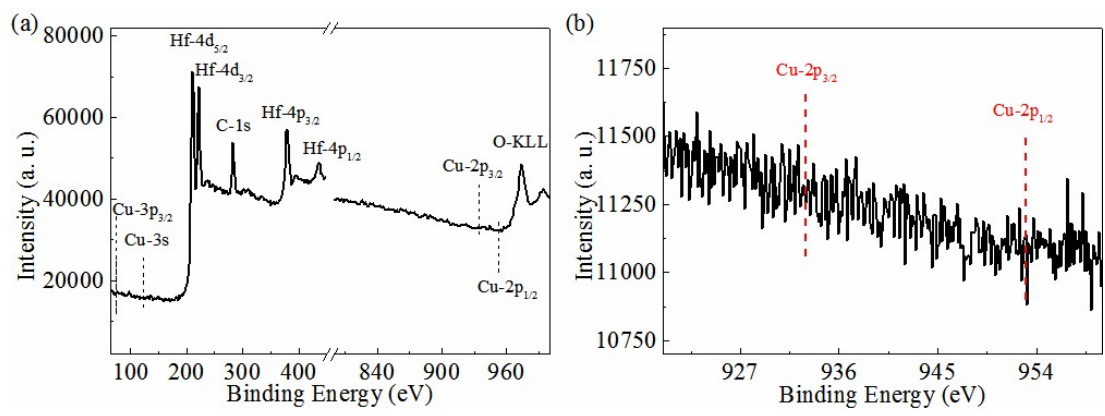

**Figure S9 The XPS spectra of the HfO<sub>2</sub> MIM device after the measurement.**
